# Supplementary material for: Recurrence- and Malignant Progression-Associated Biomarkers in Low-Grade Gliomas and Their Roles in Immunotherapy
Source: Front Immunol. 2022 May 23;13:899710. doi: 10.3389/fimmu.2022.899710 (PMC9168984; doi:10.3389/fimmu.2022.899710)
Supplement: Supplementary file 2 [file Table_2.xlsx]

## Sheet: Sheet1
uni_cox_sig_gene	bate	Hazard_Ratio	lower.95	upper.95	z_pvalue	Wald_pvalue	Likelihood_pvalue
NEIL3	0.379334	1.46131	1.30253	1.63944	1.02153e-10	1.02153e-10	6.21262e-11
DLGAP5	0.303802	1.355	1.23734	1.48384	5.55659e-11	5.55659e-11	2.42625e-11
CENPA	0.409195	1.50561	1.35222	1.67639	8.36973e-14	8.36973e-14	1.91379e-13
IGF2BP3	0.398108	1.48901	1.37329	1.61447	5.16937e-22	5.16937e-22	1.50648e-18
FAM111B	0.345975	1.41337	1.25741	1.58867	6.64926e-09	6.64926e-09	2.3048e-09
SGOL1	0.377481	1.45861	1.29952	1.63716	1.4891e-10	1.4891e-10	1.28805e-10
KIF20A	0.355669	1.42713	1.28737	1.58207	1.34477e-11	1.34477e-11	1.10877e-12
ESCO2	0.360418	1.43393	1.27859	1.60815	7.24377e-10	7.24377e-10	4.93509e-10
CEP55	0.387055	1.47264	1.31648	1.64732	1.30844e-11	1.30844e-11	7.49275e-12
HOXA1	0.458758	1.58211	1.44443	1.7329	5.27146e-23	5.27146e-23	7.36178e-18
MCM10	0.230464	1.25918	1.1386	1.39254	7.21984e-06	7.21984e-06	5.30453e-06
RAD51	0.401121	1.4935	1.31819	1.69212	3.0472e-10	3.0472e-10	1.06567e-09
CENPK	0.417034	1.51745	1.34098	1.71715	3.81308e-11	3.81308e-11	2.15164e-11
TTK	0.33804	1.4022	1.2602	1.56019	5.45409e-10	5.45409e-10	1.53058e-10
E2F2	0.275509	1.3172	1.18625	1.46261	2.50958e-07	2.50958e-07	2.44783e-07
CKAP2L	0.379428	1.46145	1.30806	1.63282	1.9874e-11	1.9874e-11	5.85791e-12
CDC25C	0.349389	1.4182	1.27201	1.58119	3.07922e-10	3.07922e-10	4.51669e-10
OIP5	0.436402	1.54713	1.35304	1.76907	1.76258e-10	1.76258e-10	6.95045e-10
CDCA2	0.423784	1.52773	1.3688	1.70512	3.99615e-14	3.99615e-14	6.29394e-14
CASC5	0.298039	1.34721	1.20976	1.50029	5.70202e-08	5.70202e-08	2.85736e-08
MND1	0.348743	1.41728	1.24772	1.60989	8.13238e-08	8.13238e-08	1.14432e-07
BUB1	0.407833	1.50356	1.33804	1.68954	7.18313e-12	7.18313e-12	2.76071e-12
KIF18A	0.512941	1.6702	1.47349	1.89316	1.03197e-15	1.03197e-15	4.07374e-16
SKA3	0.375386	1.45555	1.2836	1.65054	4.84364e-09	4.84364e-09	3.06714e-09
KIF23	0.398578	1.4897	1.33804	1.65856	3.4457e-13	3.4457e-13	2.42678e-13
ESPL1	0.337978	1.40211	1.25818	1.5625	9.59689e-10	9.59689e-10	2.57433e-10
EXO1	0.396196	1.48616	1.32839	1.66267	4.53648e-12	4.53648e-12	6.23417e-12
HOXD3	0.206314	1.22914	1.1372	1.32851	1.98065e-07	1.98065e-07	1.75989e-07
SGSM1	-0.328054	0.720324	0.653389	0.794115	4.31768e-11	4.31768e-11	2.82386e-09
HOXA4	0.287782	1.33347	1.25233	1.41985	2.57426e-19	2.57426e-19	5.97363e-15
KIF14	0.429338	1.53624	1.37301	1.71888	6.83532e-14	6.83532e-14	9.84054e-14
CENPI	0.462044	1.58731	1.37973	1.82613	1.03739e-10	1.03739e-10	2.70319e-10
HMMR	0.368194	1.44512	1.27475	1.63827	8.78578e-09	8.78578e-09	6.73392e-09
DEPDC1	0.415742	1.51549	1.36848	1.67831	1.403e-15	1.403e-15	7.2838e-15
PDIA5	0.451541	1.57073	1.33939	1.84203	2.78301e-08	2.78301e-08	2.77585e-08
CALN1	-0.321617	0.724976	0.664958	0.79041	2.99489e-13	2.99489e-13	3.26467e-12
GAS2L3	0.454029	1.57464	1.40799	1.76102	1.79245e-15	1.79245e-15	7.30397e-15
RAB42	0.65217	1.9197	1.65088	2.2323	2.3938e-17	2.3938e-17	6.83983e-16
SKA1	0.411062	1.50842	1.3437	1.69333	3.22761e-12	3.22761e-12	4.52008e-12
KSR2	-0.288171	0.749633	0.6918	0.812301	1.99538e-12	1.99538e-12	2.98577e-11
NCAPG	0.37339	1.45265	1.30399	1.61826	1.21226e-11	1.21226e-11	1.96594e-12
REPS2	-0.418417	0.658088	0.588237	0.736232	2.69914e-13	2.69914e-13	6.45171e-11
DEPDC1B	0.401959	1.49475	1.3167	1.69687	5.24171e-10	5.24171e-10	1.42918e-09
ASPM	0.380524	1.46305	1.32422	1.61644	7.40384e-14	7.40384e-14	3.07295e-14
CLSPN	0.391264	1.47885	1.3232	1.65281	5.3695e-12	5.3695e-12	7.77419e-12
NEK2	0.375635	1.45592	1.29935	1.63135	9.7347e-11	9.7347e-11	4.5077e-11
GPR65	0.267138	1.30622	1.16883	1.45976	2.46223e-06	2.46223e-06	2.71933e-06
PLK4	0.556527	1.7446	1.47386	2.06508	9.93157e-11	9.93157e-11	3.5532e-10
PPP4R4	-0.194421	0.823311	0.753236	0.899905	1.838e-05	1.838e-05	3.86226e-05
KIF4A	0.439145	1.55138	1.38791	1.7341	1.07488e-14	1.07488e-14	1.35168e-14
POC1A	0.588578	1.80143	1.52559	2.12713	3.8911e-12	3.8911e-12	2.93366e-11
TMEM63C	-0.288584	0.749324	0.657571	0.85388	1.48938e-05	1.48938e-05	5.73338e-05
HMGCLL1	-0.197251	0.820985	0.746357	0.903075	4.97778e-05	4.97778e-05	9.78369e-05
CDCA4	0.614826	1.84934	1.50074	2.2789	7.95736e-09	7.95736e-09	7.77135e-08
SGOL2	0.70219	2.01817	1.68352	2.41934	3.17604e-14	3.17604e-14	2.24157e-12
GNAL	-0.482055	0.617513	0.545372	0.699197	2.84432e-14	2.84432e-14	1.653e-12
TRIP13	0.526864	1.69361	1.44439	1.98584	8.73278e-11	8.73278e-11	5.67195e-10
XRCC2	0.629048	1.87582	1.59199	2.21026	5.69384e-14	5.69384e-14	8.79965e-13
WSCD2	-0.182296	0.833355	0.765277	0.907489	2.75882e-05	2.75882e-05	3.35478e-05
MCF2	-0.217302	0.804687	0.726786	0.890937	2.87824e-05	2.87824e-05	4.39148e-05
KCNAB1	-0.241192	0.78569	0.677678	0.910918	0.0013911	0.0013911	0.00124113
DEGS2	-0.27856	0.756873	0.641281	0.893301	0.000986457	0.000986457	0.00143115
CSMD3	-0.347811	0.706233	0.654398	0.762173	3.79826e-19	3.79826e-19	1.29721e-15
ZNF90	0.237347	1.26788	1.02903	1.56217	0.0258359	0.0258359	0.0263917
PTPRT	-0.305172	0.736996	0.67673	0.80263	2.36384e-12	2.36384e-12	1.18516e-10
SEMA4A	-0.304351	0.737602	0.626549	0.868338	0.00025654	0.00025654	0.000311376
FAM133A	-0.333951	0.716089	0.661236	0.775492	2.15485e-16	2.15485e-16	1.12659e-12
CENPE	0.468096	1.59695	1.42207	1.79333	2.56523e-15	2.56523e-15	5.26631e-15
ITPRIPL1	0.382511	1.46596	1.28738	1.66931	7.8572e-09	7.8572e-09	6.0402e-09
FAM83D	0.395676	1.48539	1.31037	1.68378	6.17234e-10	6.17234e-10	1.69149e-09
ARHGAP11B	0.498561	1.64635	1.42663	1.89992	9.01545e-12	9.01545e-12	1.55241e-11
GINS1	0.614426	1.8486	1.53808	2.2218	5.80158e-11	5.80158e-11	3.58431e-10
SPHKAP	-0.220387	0.802208	0.754289	0.853172	2.33203e-12	2.33203e-12	1.2628e-10
HGF	0.340115	1.40511	1.26179	1.5647	5.77665e-10	5.77665e-10	5.05145e-09
SHCBP1	0.539772	1.71562	1.48662	1.97988	1.5302e-13	1.5302e-13	2.6151e-13
KCNJ3	-0.201114	0.817819	0.734097	0.911089	0.000262431	0.000262431	0.000251409
RTKN2	0.219241	1.24513	1.07202	1.44619	0.00409753	0.00409753	0.00422925
WDR76	0.569948	1.76818	1.46575	2.133	2.59713e-09	2.59713e-09	2.08092e-08
ARHGAP11A	0.54126	1.71817	1.49213	1.97845	5.43964e-14	5.43964e-14	2.91852e-13
KCNJ11	-0.278368	0.757018	0.687294	0.833816	1.63789e-08	1.63789e-08	4.04806e-08
AMZ1	-0.424471	0.654116	0.572079	0.747917	5.3596e-10	5.3596e-10	2.18227e-09
MN1	-0.604595	0.546295	0.466546	0.639677	5.94652e-14	5.94652e-14	3.77414e-12
FAM72D	0.589708	1.80346	1.47917	2.19885	5.51831e-09	5.51831e-09	1.38179e-08
KCNK4	-0.331516	0.717835	0.633904	0.812878	1.73595e-07	1.73595e-07	4.32333e-07
SHISA9	-0.101401	0.90357	0.824099	0.990705	0.0308681	0.0308681	0.0340431
CACNG2	-0.242053	0.785015	0.729987	0.84419	6.6717e-11	6.6717e-11	1.89734e-10
